# Supplementary material
Source: PubMed Central journal article supplement (PMC1764047)
Supplement: pcbi.0020169.sg001.pdf [file pcbi.0020169.sg001.pdf]

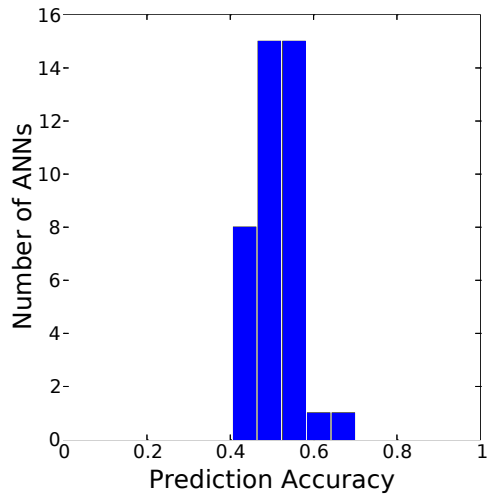

(a) ANN Accuracy

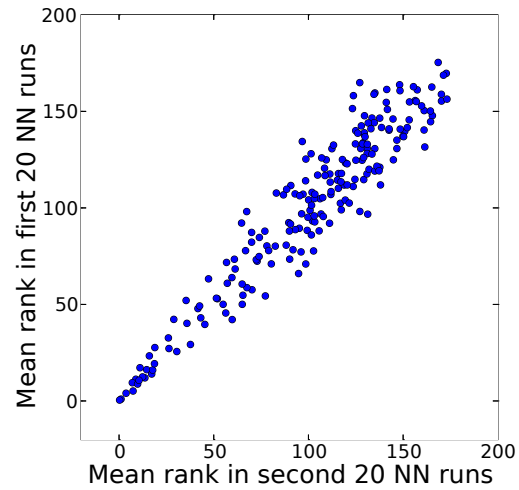

(b) ANN Reproducibility

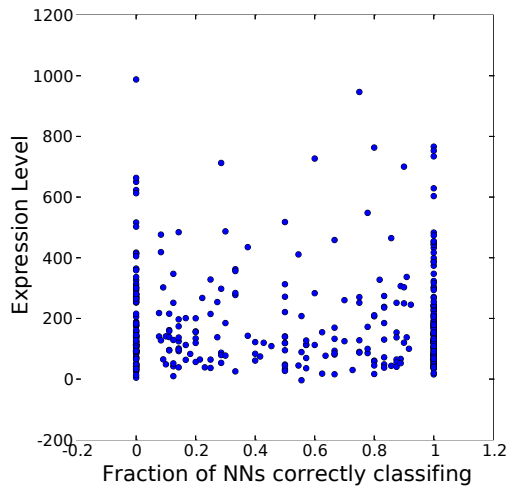

(c) Predictability Vs Expression Level

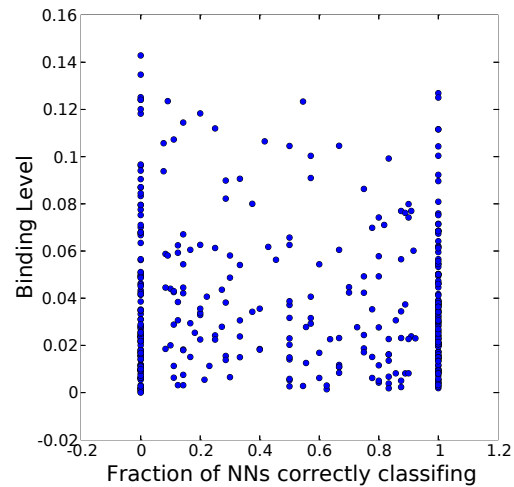

(d) Predictability Vs Binding Level
