# Supplementary material
Source: PubMed Central journal article supplement (PMC1764047)

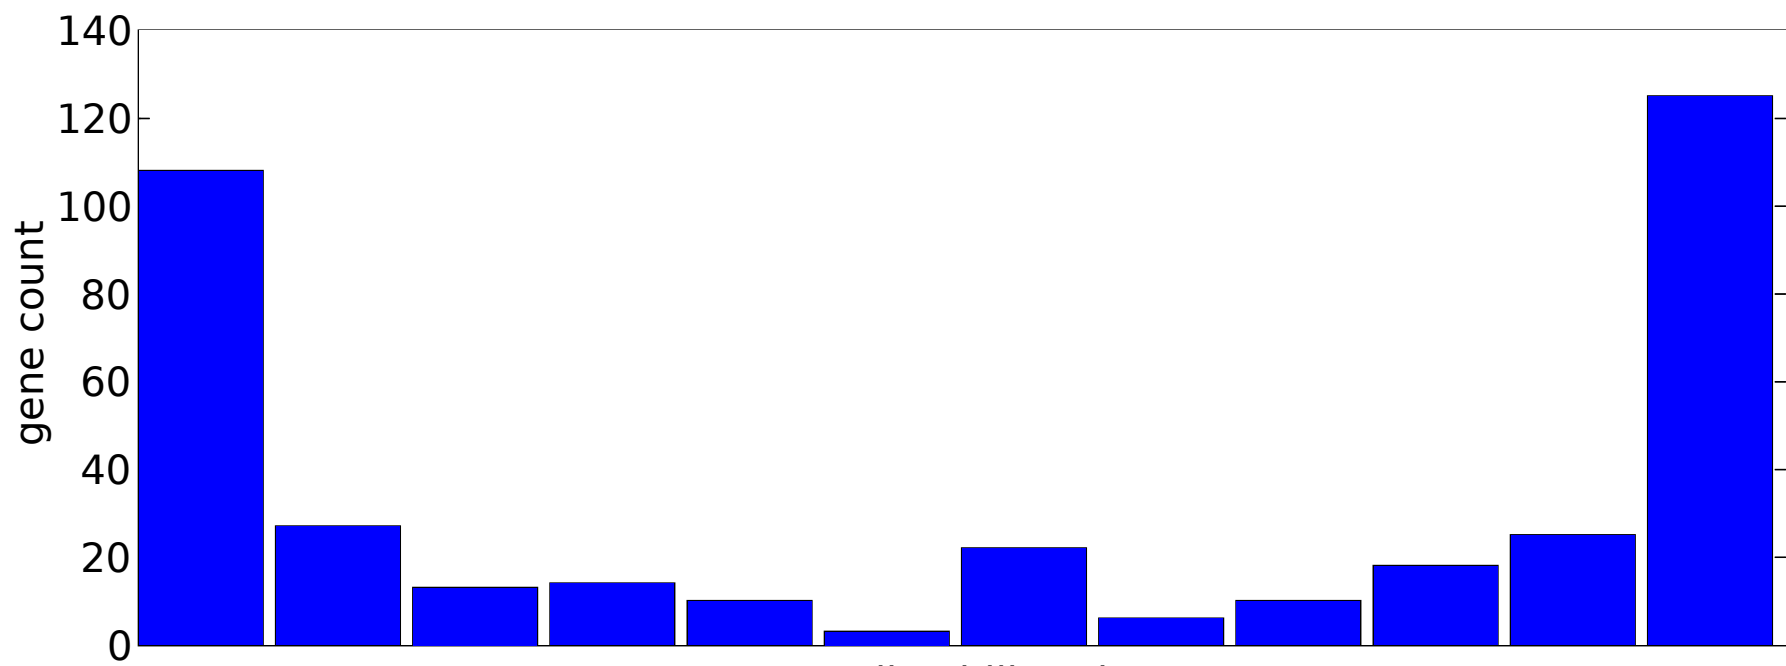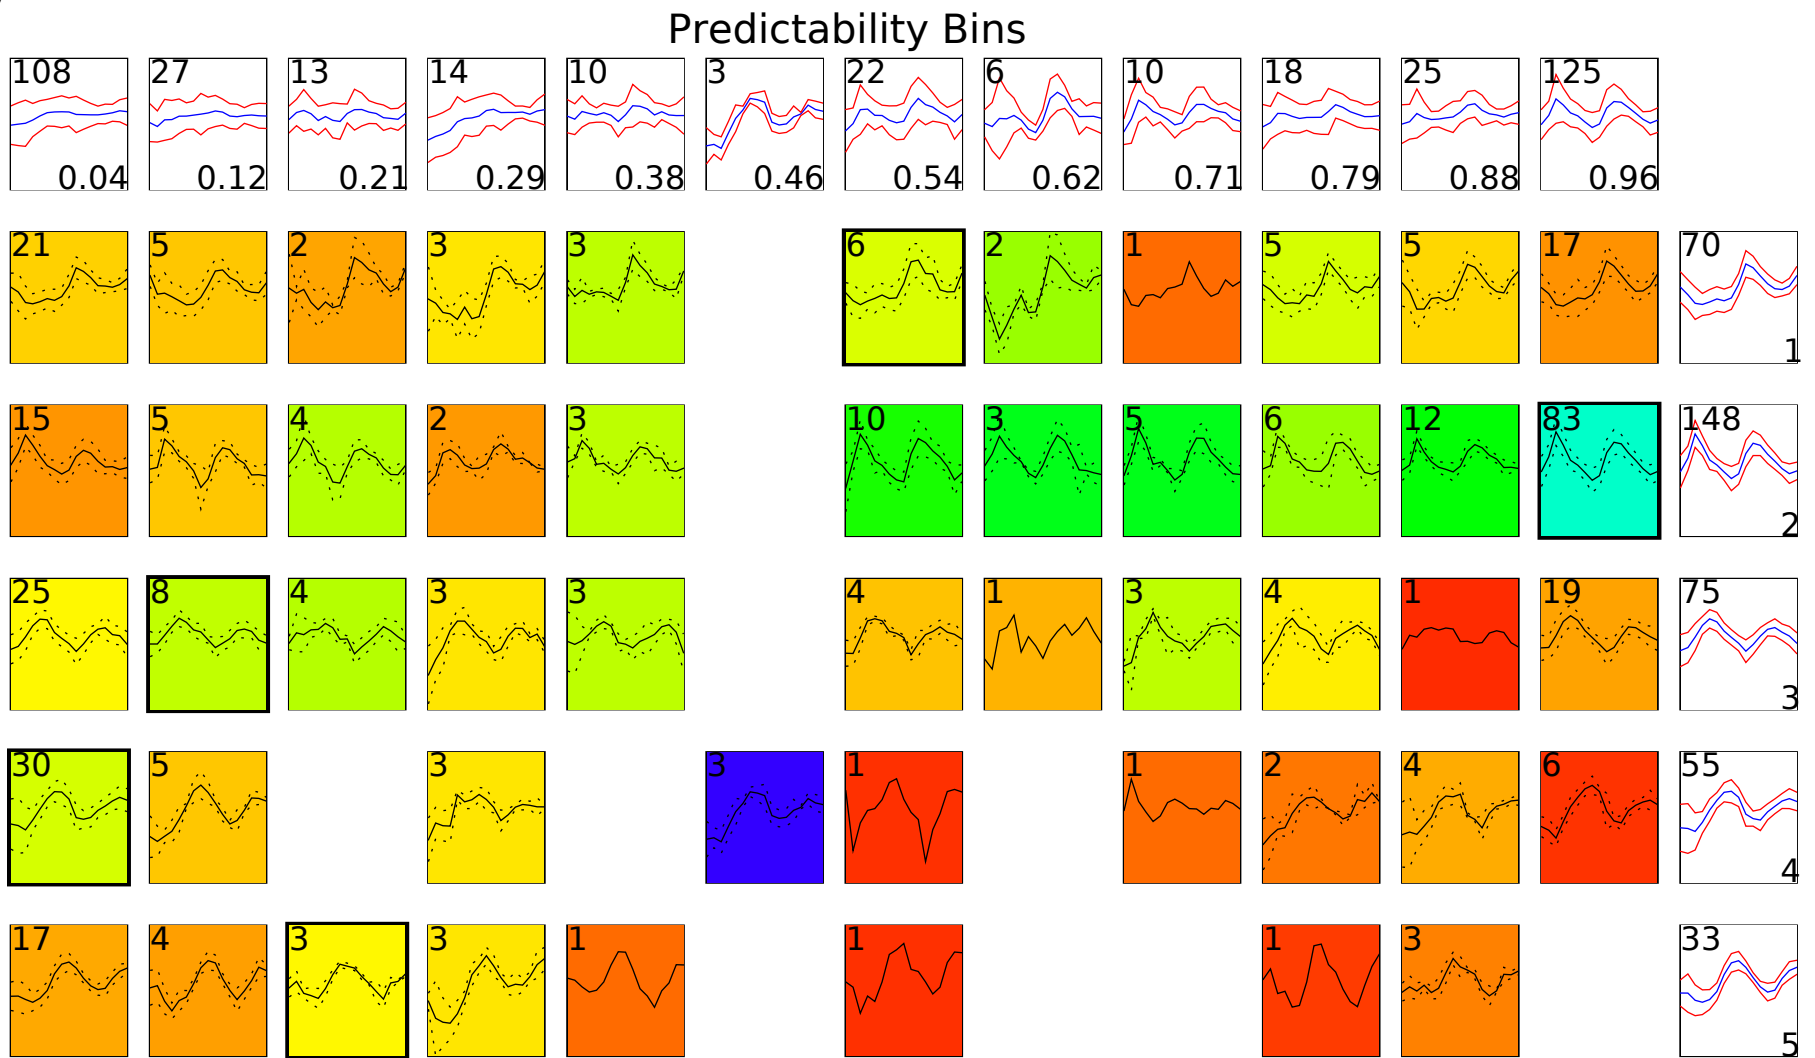

Supplement: pcbi.0020169.sg002.pdf [file pcbi.0020169.sg002.pdf]

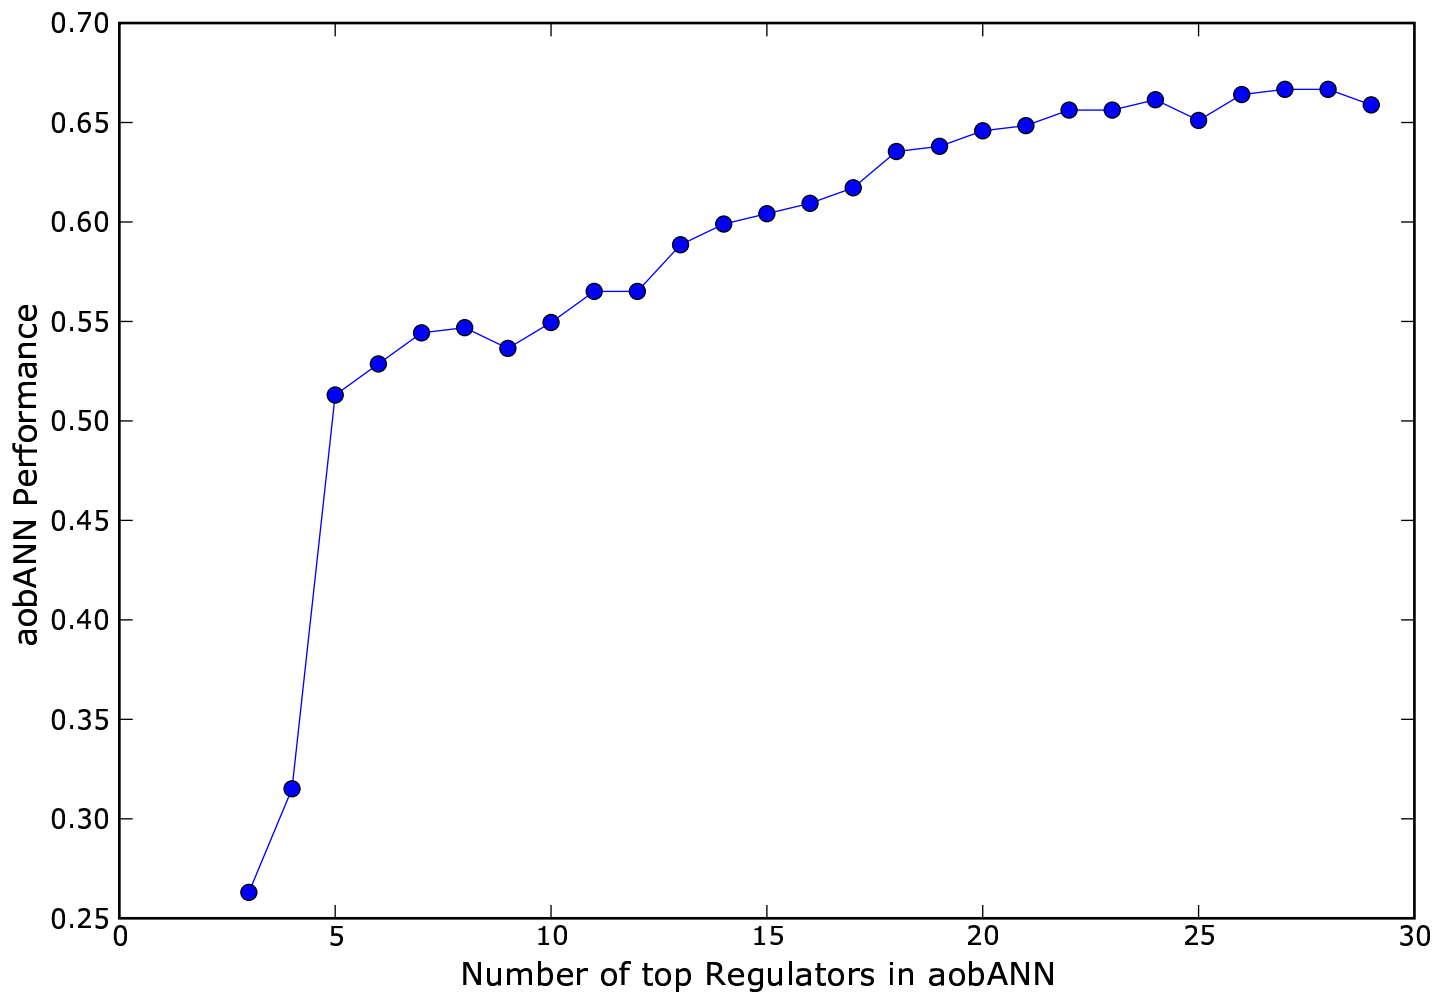

Supplement: pcbi.0020169.sg003.pdf [file pcbi.0020169.sg003.pdf]

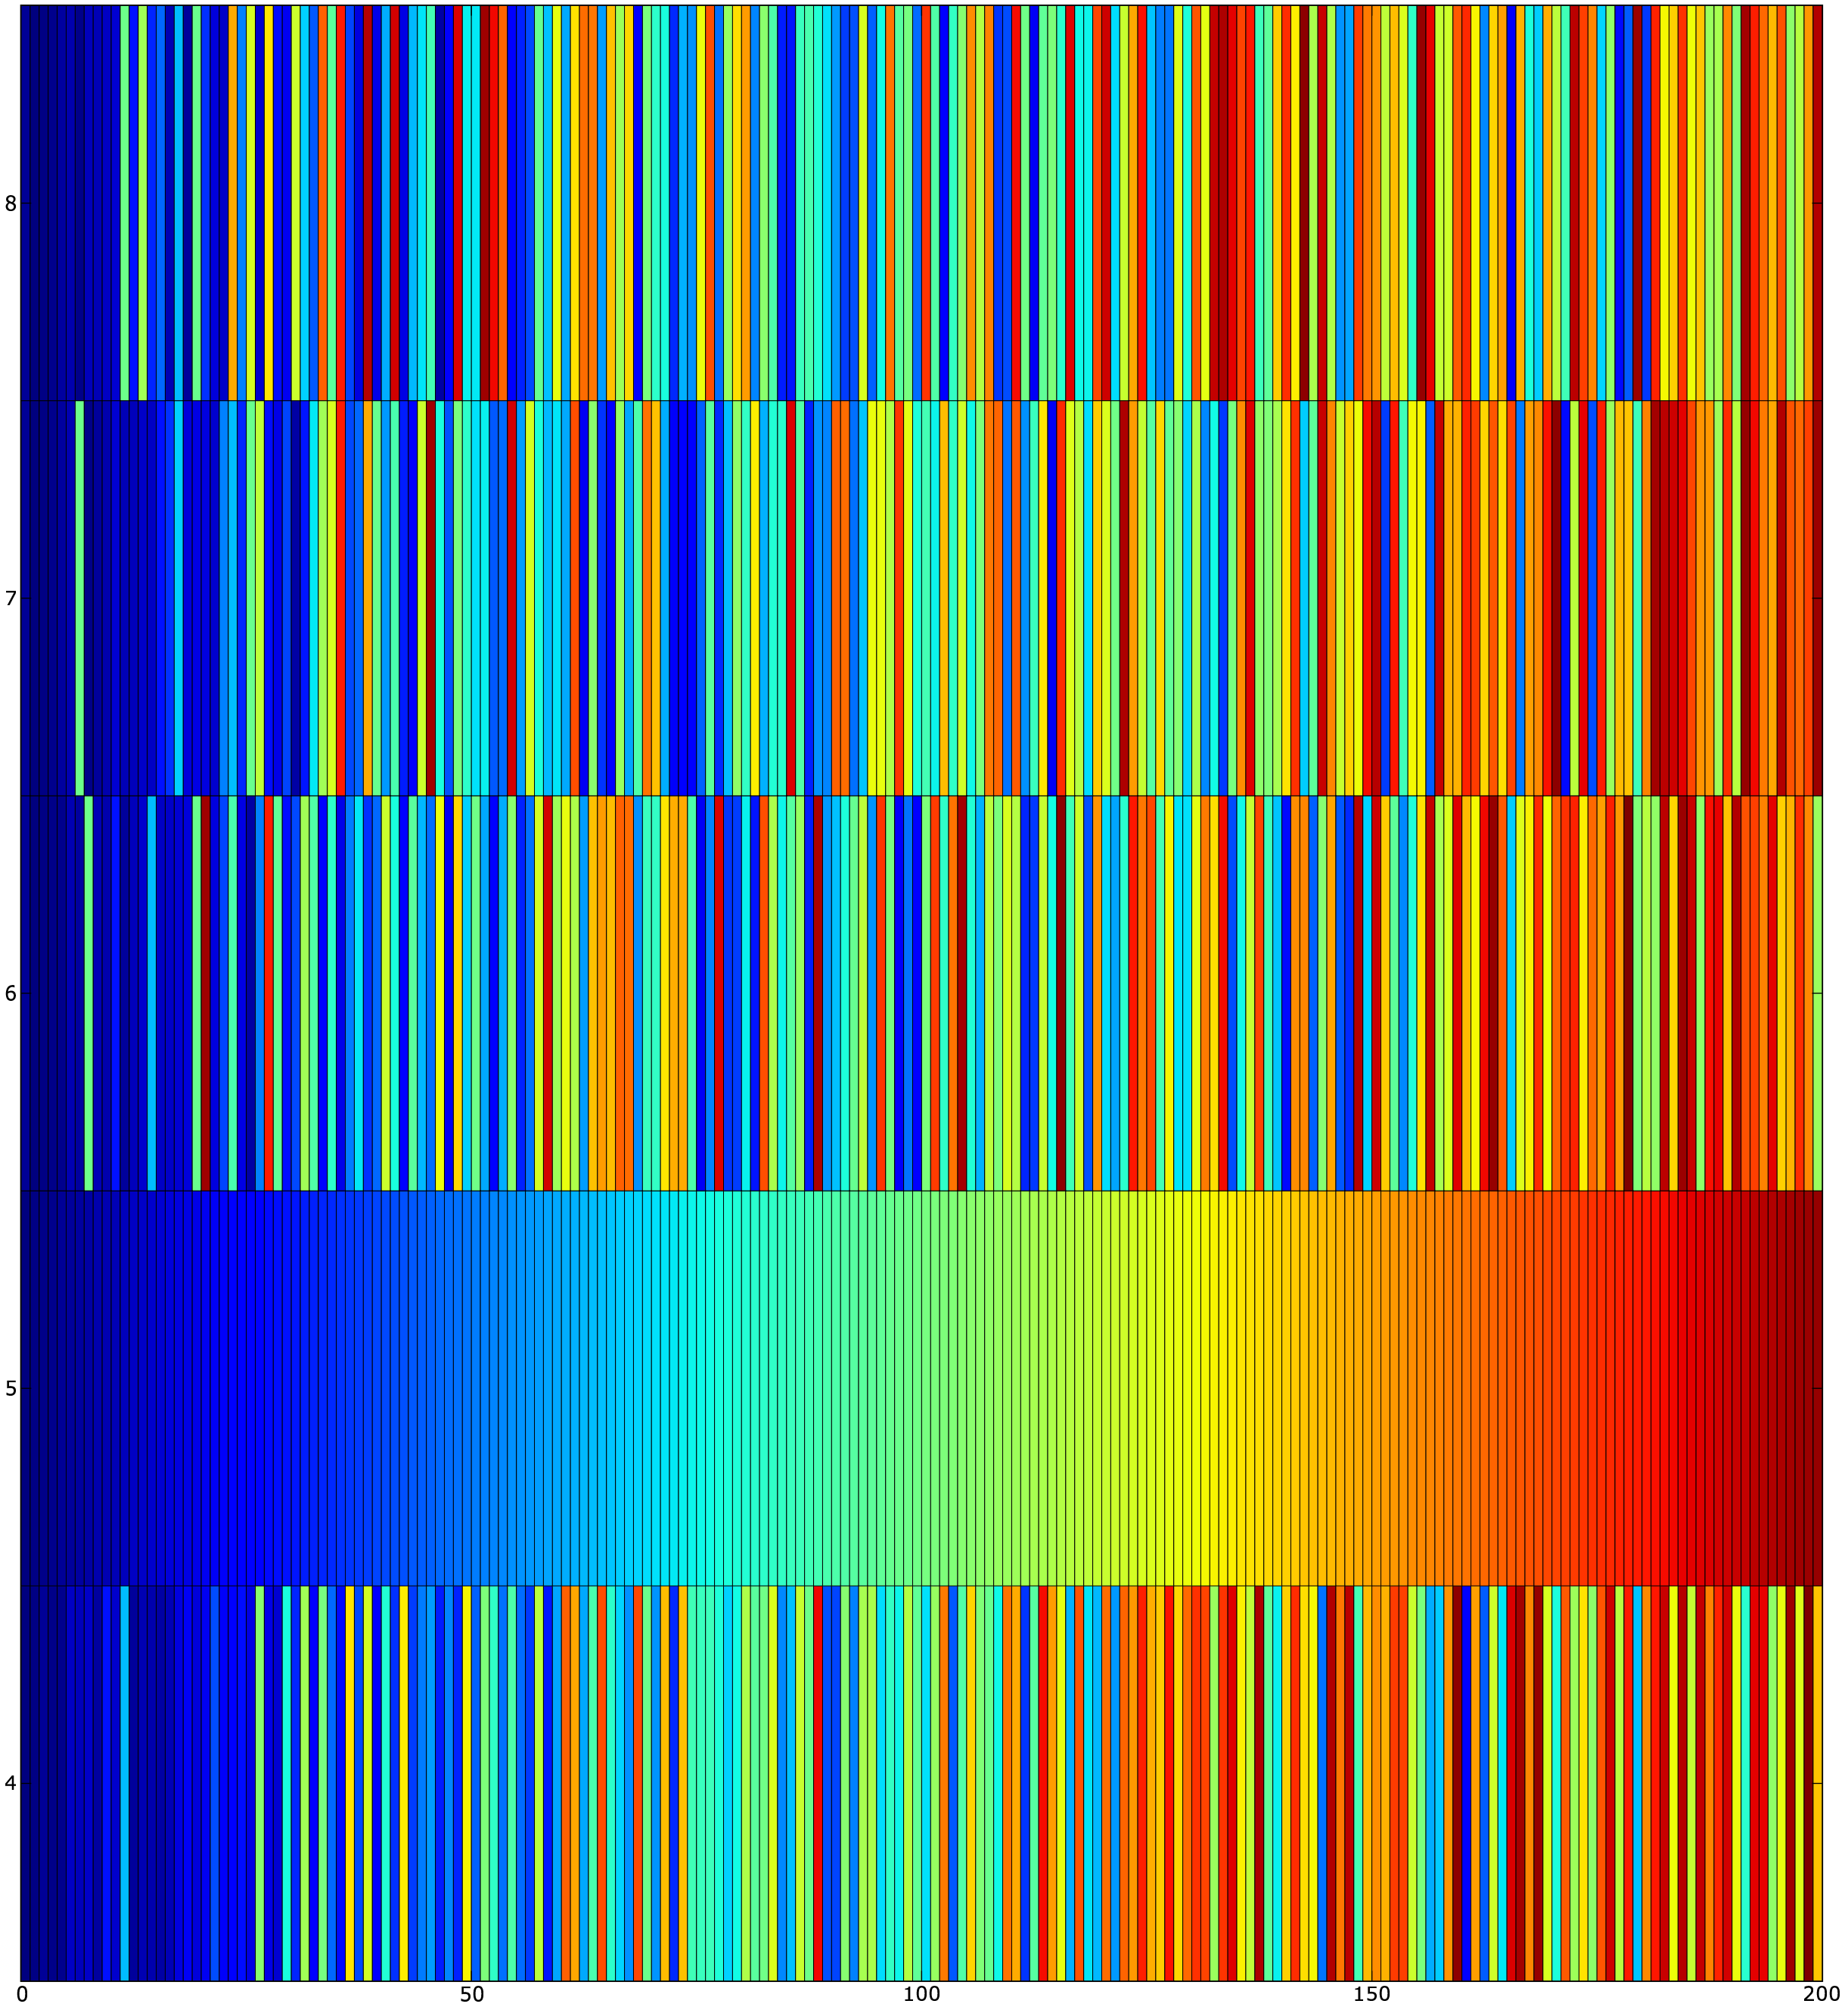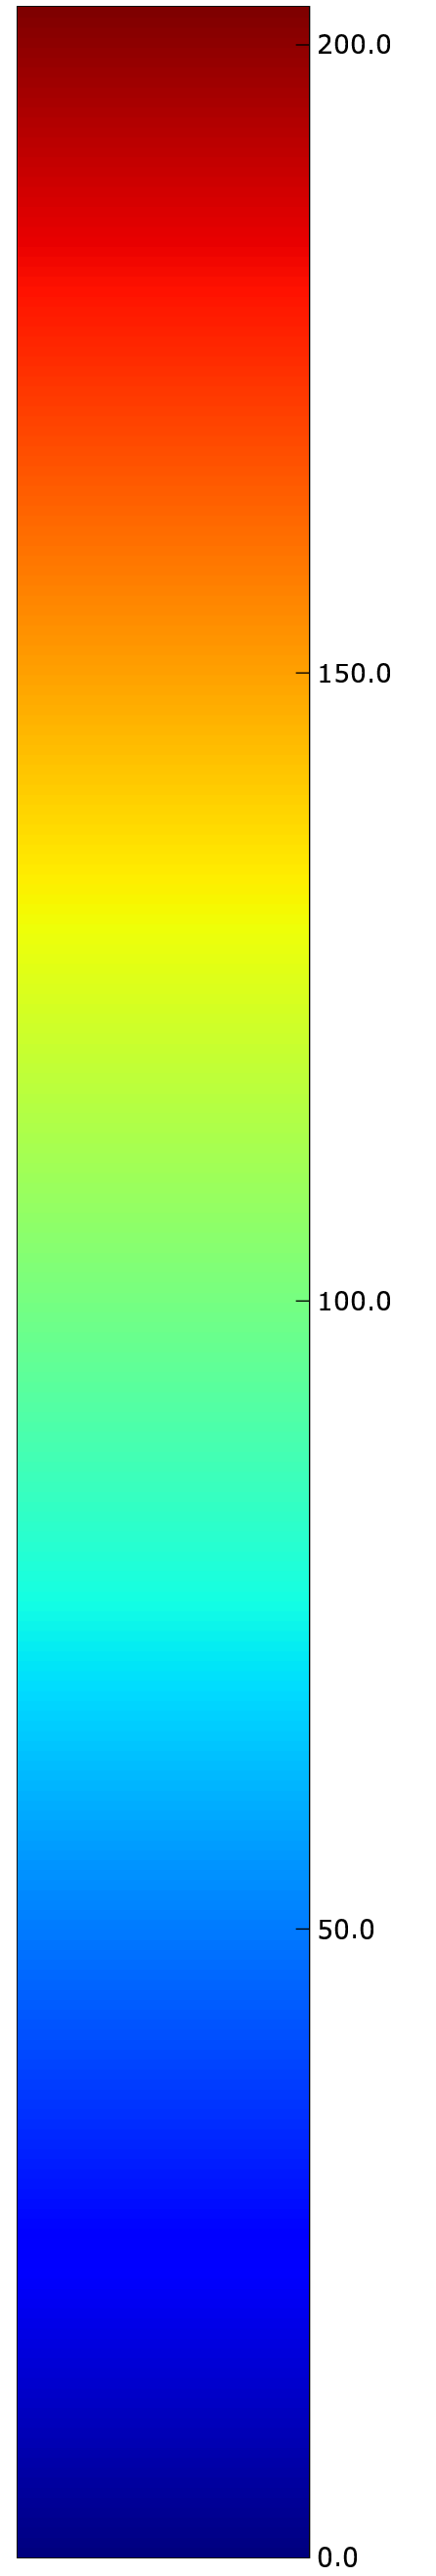

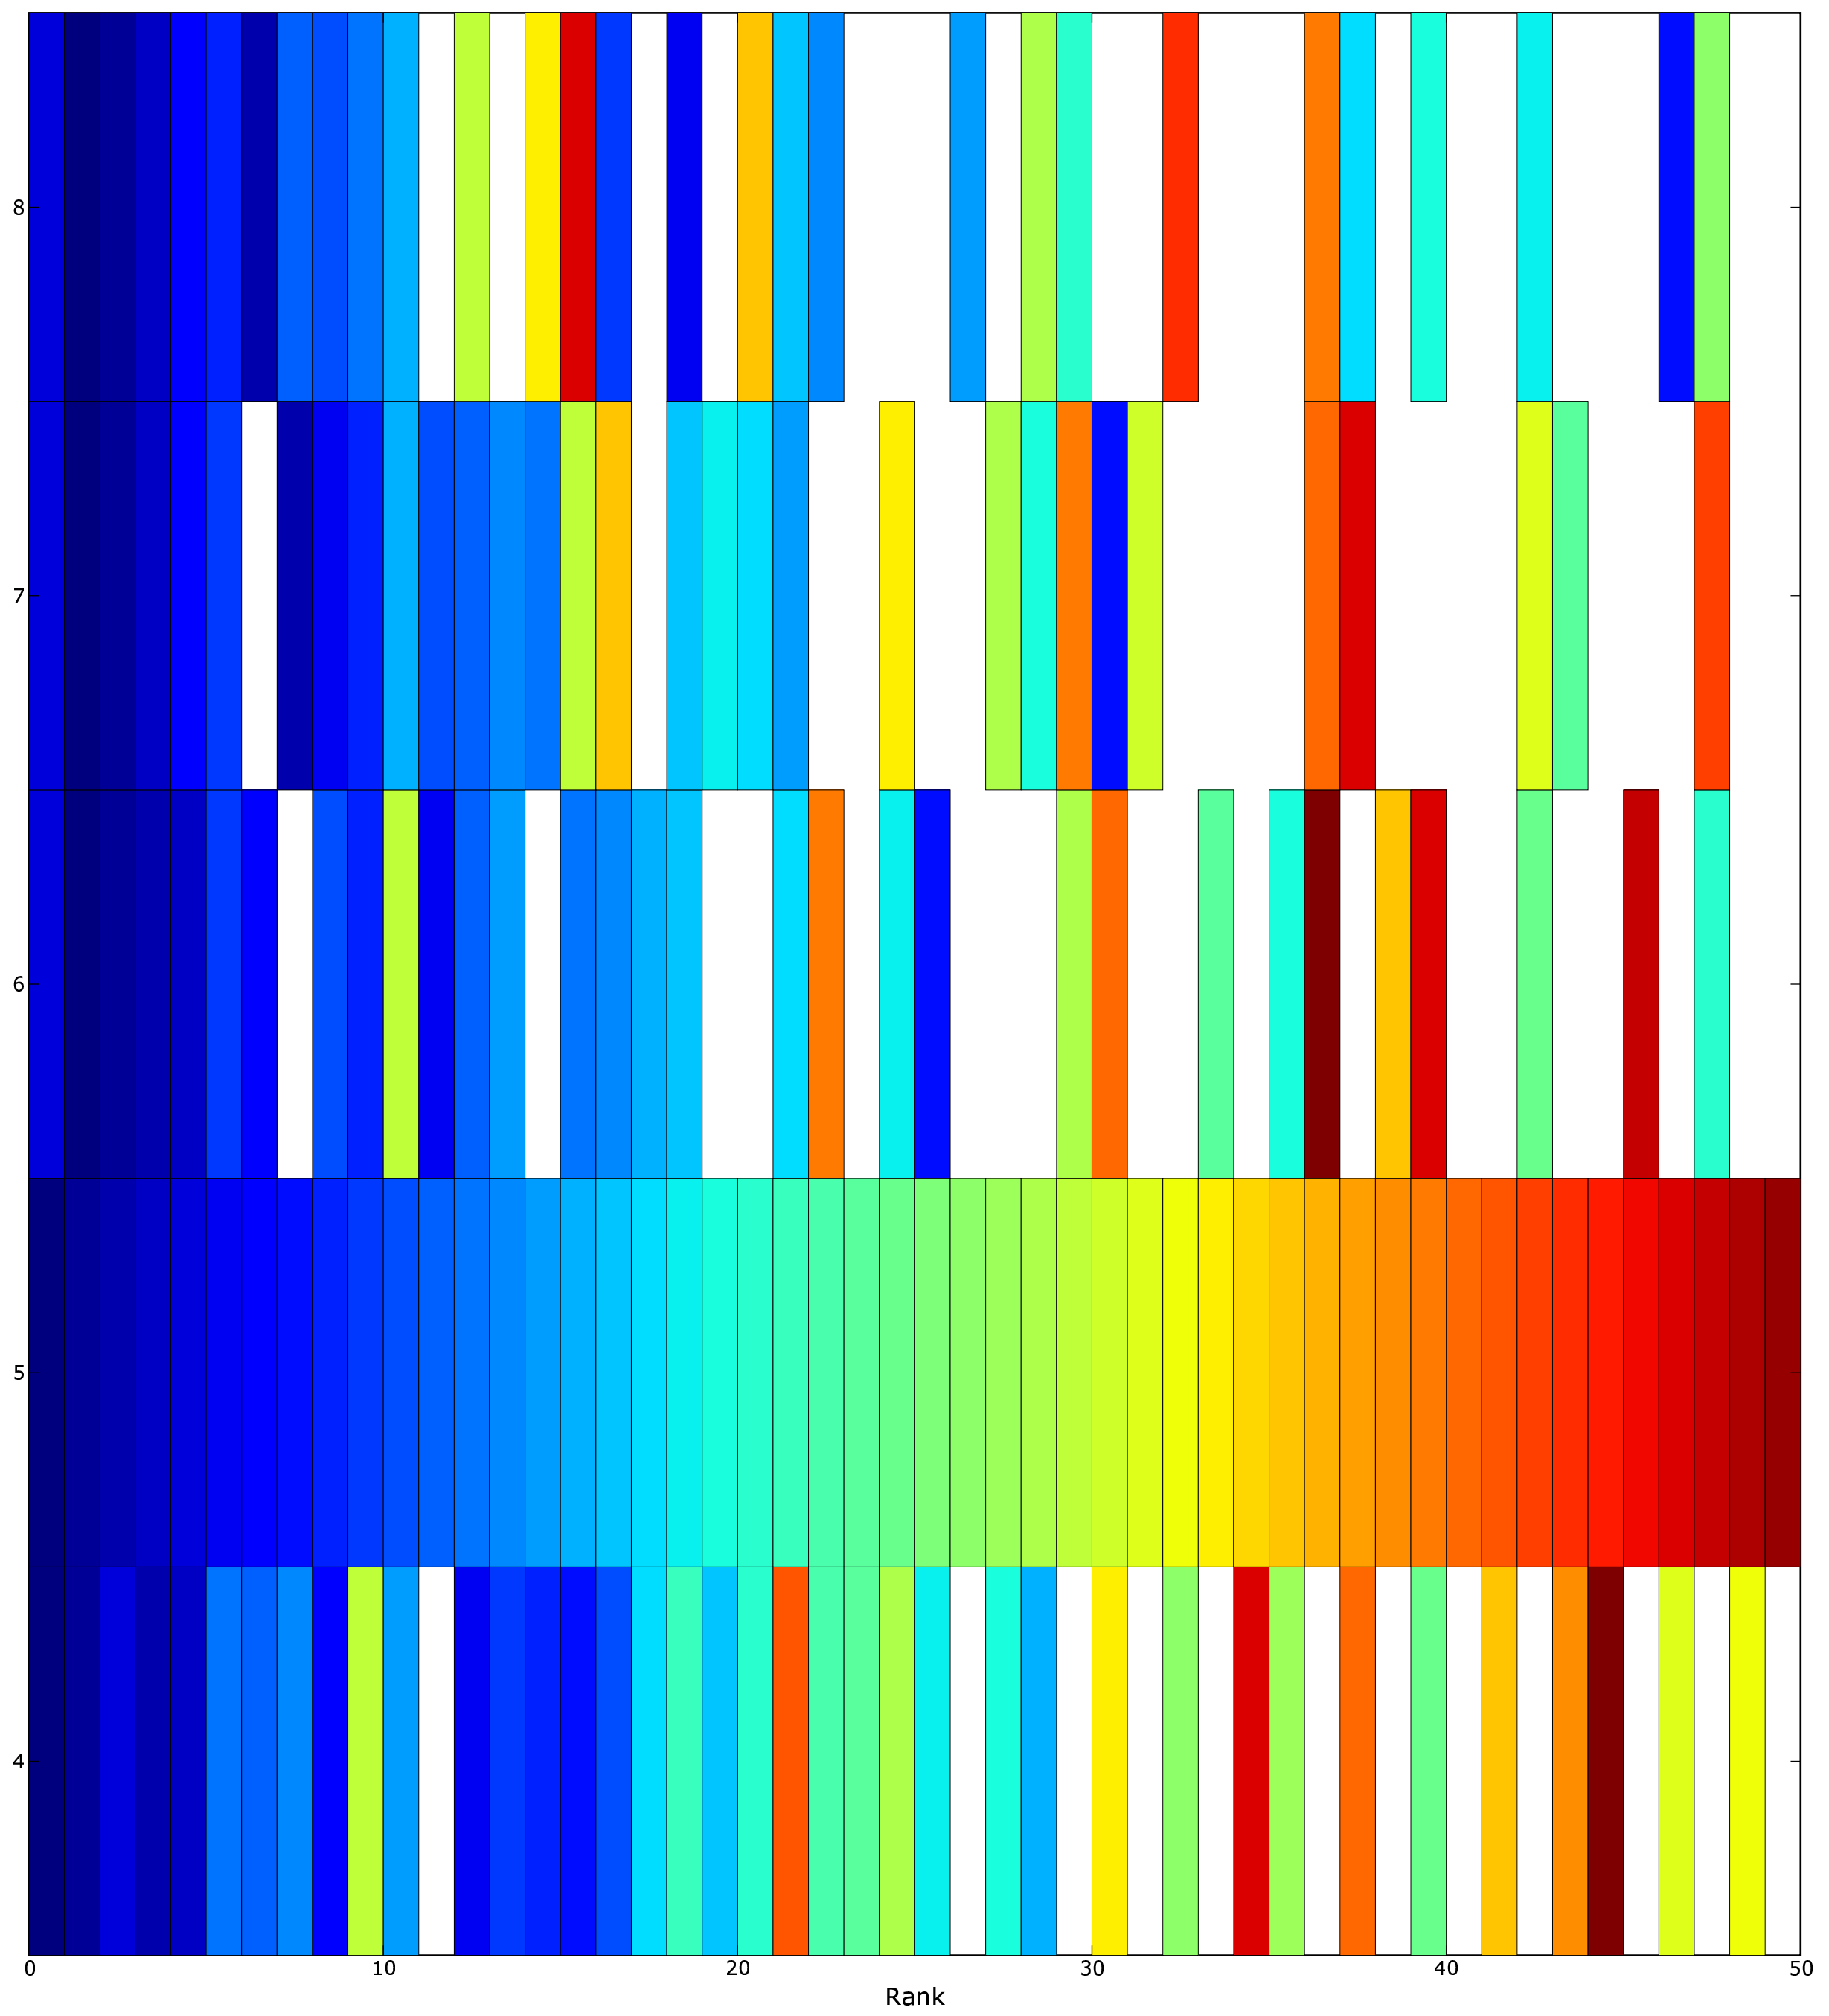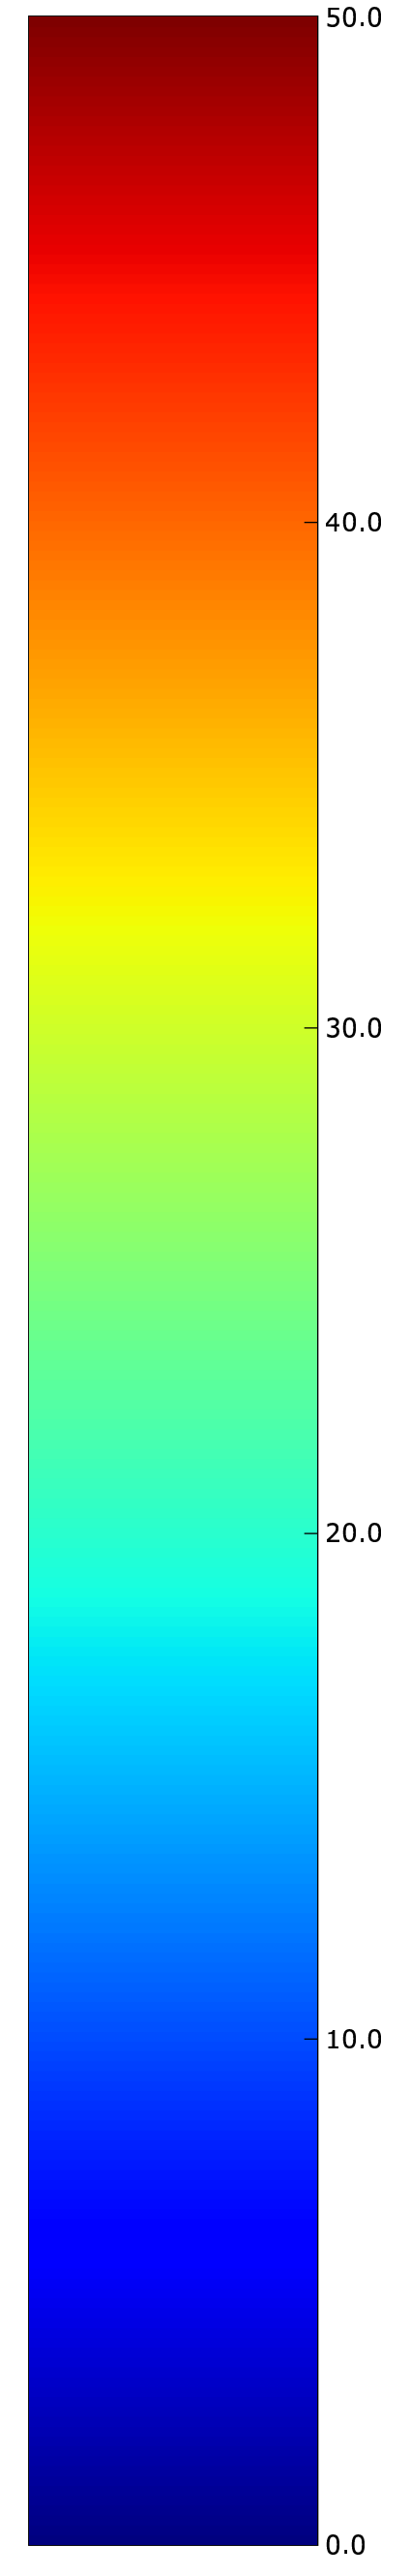

Supplement: pcbi.0020169.sg004.pdf [file pcbi.0020169.sg004.pdf]
